# Supplementary material for: La2Sb, a layered superconductor with metal–metal bonds
Source: Royal Society of Chemistry journal article supplement (doi:10.1039/c0cc05384h), 2011-01-01
Supplement: c0cc05384h.pdf [file c0cc05384h.pdf]

## Supplementary Information

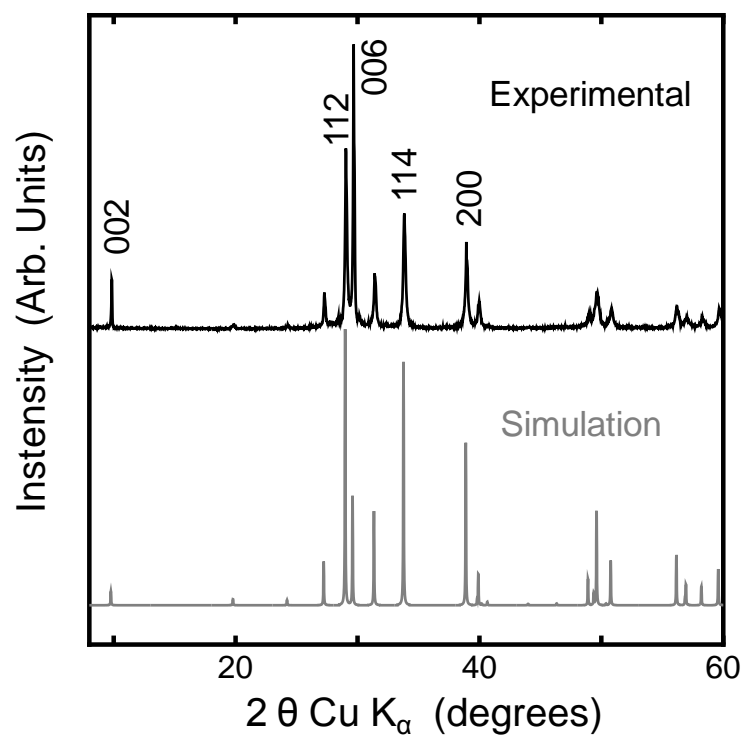

**Figure S1.** Powder XRD pattern of the  $\text{La}_2\text{Sb}$  sample, together with simulation pattern based on the structural data obtained from single crystal structure analysis.<sup>11</sup> Strong influence due to preferred orientation is seen.
